# Supplementary material for: Cholesterol nanoarchaeosomes for alendronate targeted delivery as an anti-endothelial dysfunction agent
Source: PubMed Central journal article supplement (PMC11106671; doi:10.3762/bjnano.15.46), 2024-05-13
Supplement: Beilstein_J_Nanotechnol-15-517-s001.pdf [file Beilstein_J_Nanotechnol-15-517-s001.pdf]

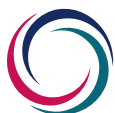

## Supporting Information

for

### **Cholesterol nanoarchaeosomes for alendronate targeted delivery as an anti-endothelial dysfunction agent**

Horacio Emanuel Jerez, Yamila Roxana Simioni, Kajal Ghosal, Maria Jose Morilla and Eder Lilia Romero

*Beilstein J. Nanotechnol.* **2024**, *15*, 517–534. [doi:10.3762/bjnano.15.46](https://doi.org/10.3762/bjnano.15.46)

## Additional figures

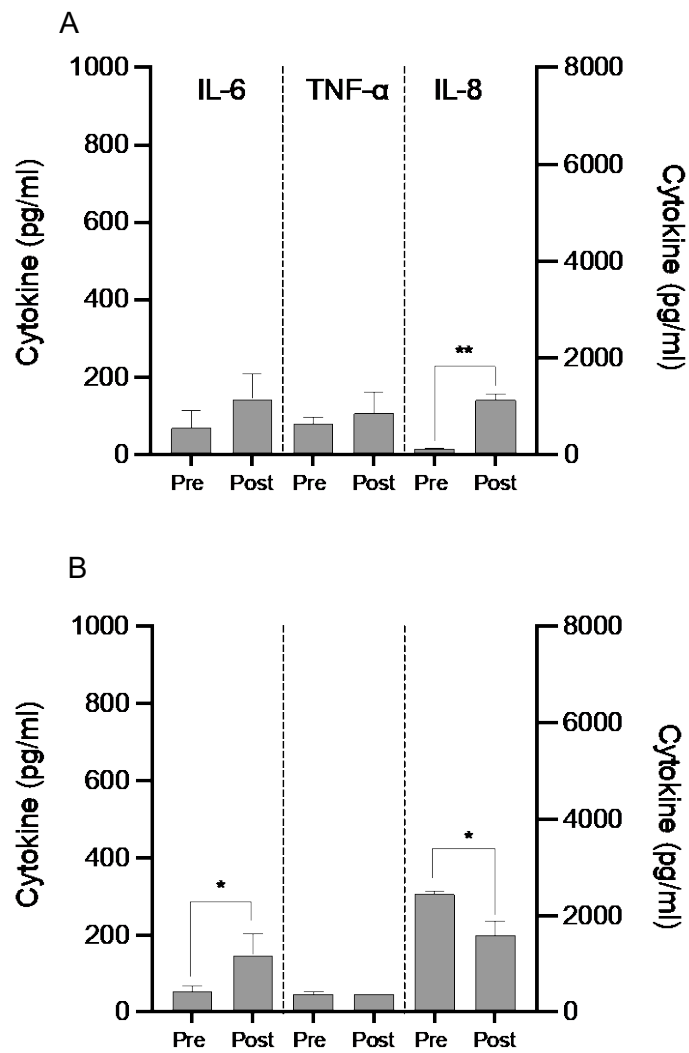

**Figure S1:** Cytokine release in the compartments of the mild inflammation model before (pre) and after (post) 24 h of crosstalk incubation: (A) apical (HUVECs) and (B) basolateral (THP-1 macrophages). Values of IL-6 and TNF- $\alpha$  are shown on the left Y axis, and values of IL-8 are shown on the right Y axis. Data are expressed as mean  $\pm$  SD ( $n = 2$ ).

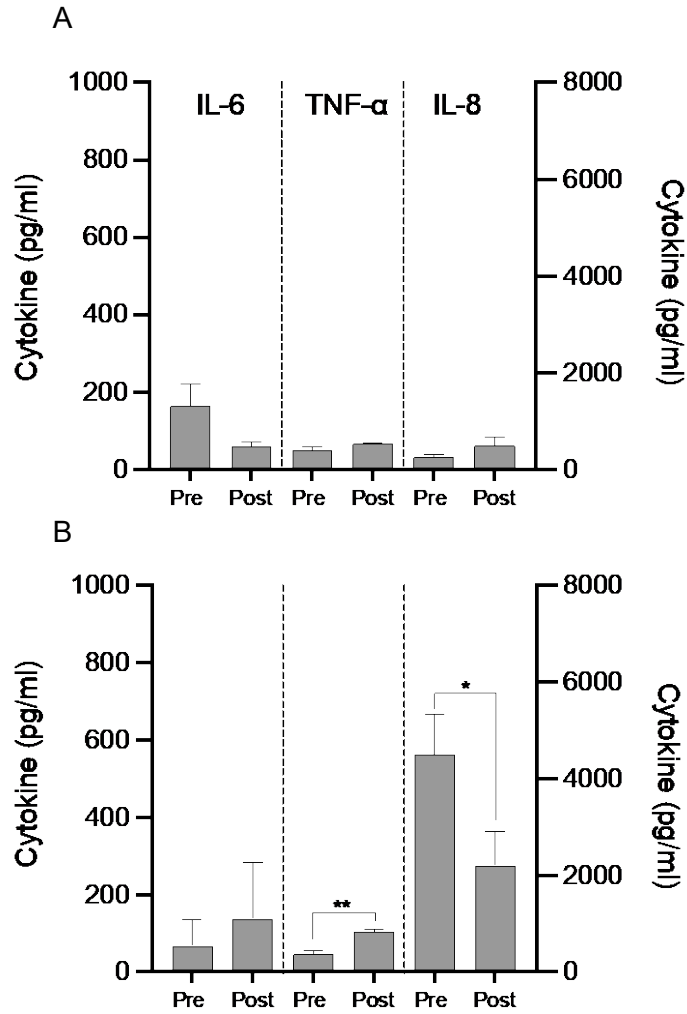

**Figure S2:** Cytokine release in the compartments of the pronounced inflammation model before (pre) and after (post) 24 h of cross-talk incubation: (A) apical (HUVECs) and (B) basolateral (FCs). Values of IL-6 and TNF- $\alpha$  are shown on the left Y axis, and values of IL-8 are shown on the right Y axis. Data are expressed as mean  $\pm$  SD ( $n = 2$ ).

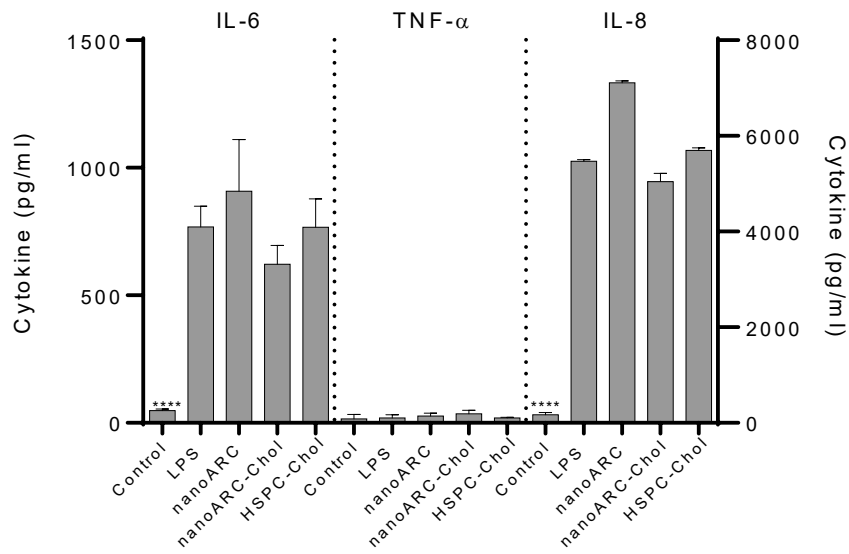

**Figure S3:** Cytokine release in the upper compartment of the mild inflammation model after incubation with void vesicles. Values of IL-6 and TNF- $\alpha$  are shown on the left Y axis, and values of IL-8 are shown on the right Y axis. Data are expressed as mean  $\pm$  SD ( $n = 2$ ).
